# Supplementary material for: Manual de cristología
Source: PLOS journal article supplement (doi:10.1371/journal.pone.0047363), 2003-01-01
Supplement: S1 (10.1371/journal.pone.0047363.s001) [file journal.pone.0047363.s001]

## SUPPORTING INFORMATION

### **Table S1 Ratios of the density of feeding-scars to the number of predator seastar *Acanthaster* as observed in transect-counts on Moorean reefs during the outbreak.**

Transect-counts (n = 40) were conducted randomly through the process of the outbreak on reef locations where seastars were observed. Transects were led randomly along constant depth contours in the same portions of the reefs that were sampled by the SCUBA-tow technique (i.e., in the 10-30 m depth range on the outer reefs of Moorea). Because both *Acanthaster* density and coral coverage were varying through time and space over the span of the outbreak (refer to Figure 4 in the core of the manuscript), variability in the density of feeding-scars could result either from variations in abundance of predator seastars, or from differences in abundance of prey corals. Densities of *Acanthaster* feeding-scars were thus indirect evidences of the distribution and frequency of recent predation events, rather than quantitative measurements of the actual density of seastars on reefs. Results indicate a mean correspondence of  $8.6 \pm 1.7$  SE scars counted per individual *Acanthaster*, meaning that seastars were on average feeding 8-9 times per period of ~ 3 weeks, time laps during which the feeding-scars were remaining clearly visible following recent predation (see Figure 1 in the core of the manuscript for illustrations).

| Date      | Site            | Transect size                 | n Scar | n <i>Acanthaster</i> | n Scar / n <i>Acanthaster</i> |
|-----------|-----------------|-------------------------------|--------|----------------------|-------------------------------|
| Nov. 2006 | Opunohu West    | 250m <sup>2</sup> (50m x 5m)  | 68     | 7                    | 9.71                          |
| Nov. 2006 | Opunohu West    | 250m <sup>2</sup> (50m x 5m)  | 41     | 9                    | 4.56                          |
| Nov. 2006 | Opunohu West    | 250m <sup>2</sup> (50m x 5m)  | 26     | 2                    | 13                            |
| Nov. 2006 | Opunohu East    | 250m <sup>2</sup> (50m x 5m)  | 77     | 7                    | 11                            |
| Nov. 2006 | Opunohu East    | 250m <sup>2</sup> (50m x 5m)  | 5      | 1                    | 5                             |
| Nov. 2006 | Opunohu East    | 250m <sup>2</sup> (50m x 5m)  | 5      | 2                    | 2.5                           |
| Nov. 2006 | Opunohu East    | 250m <sup>2</sup> (50m x 5m)  | 10     | 1                    | 10                            |
| Nov. 2006 | Vaiare          | 250m <sup>2</sup> (50m x 5m)  | 53     | 6                    | 8.83                          |
| Nov. 2006 | Vaiare          | 250m <sup>2</sup> (50m x 5m)  | 52     | 4                    | 13                            |
| Nov. 2006 | Haapiti Taotaha | 250m <sup>2</sup> (50m x 5m)  | 62     | 7                    | 8.86                          |
| Nov. 2006 | Haapiti Taotaha | 250m <sup>2</sup> (50m x 5m)  | 34     | 3                    | 11.33                         |
| Apr. 2007 | Vaipahu         | 350m <sup>2</sup> (25m x 14m) | 75     | 7                    | 10.71                         |
| Apr. 2007 | Tiahura         | 350m <sup>2</sup> (25m x 14m) | 7      | 1                    | 7                             |
| Apr. 2007 | Haapiti         | 350m <sup>2</sup> (25m x 14m) | 26     | 3                    | 8.67                          |
| Jan. 2008 | Vaipahu         | 250m <sup>2</sup> (50m x 5m)  | 16     | 1                    | 16                            |
| Jan. 2008 | Vaipahu         | 250m <sup>2</sup> (50m x 5m)  | 3      | 1                    | 3                             |
| Jan. 2008 | Vaipahu         | 250m <sup>2</sup> (50m x 5m)  | 12     | 3                    | 4                             |
| Jan. 2008 | Haapiti         | 250m <sup>2</sup> (50m x 5m)  | 55     | 1                    | 55                            |
| Jan. 2008 | Haapiti         | 250m <sup>2</sup> (50m x 5m)  | 73     | 3                    | 24.33                         |
| Jan. 2008 | Haapiti         | 250m <sup>2</sup> (50m x 5m)  | 69     | 2                    | 34.5                          |
| Jan. 2008 | Vaiare          | 250m <sup>2</sup> (50m x 5m)  | 42     | 8                    | 5.25                          |
| Jan. 2008 | Vaiare          | 250m <sup>2</sup> (50m x 5m)  | 66     | 6                    | 11                            |
| Jan. 2008 | Vaiare          | 250m <sup>2</sup> (50m x 5m)  | 23     | 1                    | 23                            |
| Jan. 2008 | Vaiare          | 250m <sup>2</sup> (50m x 5m)  | 6      | 1                    | 6                             |
| Jan. 2008 | Vaiare          | 250m <sup>2</sup> (50m x 5m)  | 22     | 2                    | 11                            |
| Jan. 2009 | Vaipahu         | 250m <sup>2</sup> (50m x 5m)  | 6      | 3                    | 2                             |
| Jan. 2009 | Vaipahu         | 250m <sup>2</sup> (50m x 5m)  | 15     | 2                    | 7.5                           |
| Jan. 2009 | Vaipahu         | 250m <sup>2</sup> (50m x 5m)  | 0      | 1                    | 0                             |
| Jan. 2009 | Vaipahu         | 250m <sup>2</sup> (50m x 5m)  | 1      | 1                    | 1                             |
| Jan. 2009 | Vaipahu         | 250m <sup>2</sup> (50m x 5m)  | 4      | 1                    | 4                             |
| Jan. 2009 | Vaipahu         | 250m <sup>2</sup> (50m x 5m)  | 0      | 1                    | 0                             |
| Jan. 2009 | Vaipahu         | 250m <sup>2</sup> (50m x 5m)  | 0      | 4                    | 0                             |
| Jan. 2009 | Vaipahu         | 250m <sup>2</sup> (50m x 5m)  | 0      | 1                    | 0                             |
| Jan. 2009 | Haapiti         | 250m <sup>2</sup> (50m x 5m)  | 0      | 3                    | 0                             |
| Jan. 2009 | Haapiti         | 250m <sup>2</sup> (50m x 5m)  | 1      | 5                    | 0.2                           |
| Jan. 2009 | Haapiti         | 250m <sup>2</sup> (50m x 5m)  | 27     | 6                    | 4.5                           |
| Jan. 2009 | Haapiti         | 250m <sup>2</sup> (50m x 5m)  | 0      | 4                    | 0                             |
| Jan. 2009 | Haapiti         | 250m <sup>2</sup> (50m x 5m)  | 0      | 3                    | 0                             |
| Jan. 2009 | Vaiare          | 250m <sup>2</sup> (50m x 5m)  | 0      | 1                    | 0                             |
| Jan. 2009 | Vaiare          | 250m <sup>2</sup> (50m x 5m)  | 8      | 1                    | 8                             |
|           |                 |                               |        | <b>Mean</b>          | <b>8.61</b>                   |
|           |                 |                               |        | <b>SE</b>            | <b>1.67</b>                   |
